# Supplementary material
Source: publisher site journal article supplement (https://www.dovepress.com/article/367472)
Supplement: Supplementary file 1 [file get_supplementary_file.php]

## Supplementary materials

## Table S1. OM Scales

National Cancer Institute (NCI) common toxicity criteria (CTC)

| **Grade** | **Description** |
| --- | --- |
| Grade 0 | none |
| Grade 1 | painless ulcers, erythema or mild soreness in the absence of lesions |
| Grade 2 | painful erythema, edema, or ulcers but eating or swallowing possible |
| Grade 3 | painful erythema, edema, or ulcers requiring IV hydration |
| Grade 4 | severe ulceration or requiring parenteral or enteral nutrition support or prophylactic intubation |

**Notes:** Adapted from Sonis ST, Elting LS, Keefe D, et al. Perspectives on cancer therapy-induced mucosal injury: pathogenesis, measurement, epidemiology, and consequences for patients. *Cancer Am Cancer Soc*. 2004;100(9 Suppl):1995-2025.1 © 2004 American Cancer Society.

**Table S2.** World Health Organization (WHO) scale

| **Grade** | **Description** |
| --- | --- |
| Grade 0 | None |
| Grade 1 | Oral soreness, erythema |
| Grade 2 | Oral erythema, ulcers, solid diet tolerated |
| Grade 3 | Oral ulcers, liquid diet only |
| Grade 4 | Oral alimentation impossible |

**Notes:** Adapted from Sonis ST, Elting LS, Keefe D, et al. Perspectives on cancer therapy-induced mucosal injury: pathogenesis, measurement, epidemiology, and consequences for patients. *Cancer Am Cancer Soc*. 2004;100(9 Suppl):1995-2025.1 © 2004 American Cancer Society.

## Table S3. Data extraction form

| **Use of honey in the management of Chemotherapy associated oral mucositis in the paediatric patients**  **Data Extraction Form 1** | | | | | | | | |
| --- | --- | --- | --- | --- | --- | --- | --- | --- |
| People who complete this form: Luyang Zhang  Revision date:15/06/2020 | | | | | | | | |
| Title | First author; Publication year | Study design | Country | Setting | Study date range | Sample size; sex; age | OM grade | Assessment tools |
| Honey and a Mixture of Honey, Beeswax, and Olive Oil–Propolis Extract in Treatment of Chemotherapy-Induced Oral Mucositis: A Randomized Controlled pilot study2 | Abdulrhman1 2012 | Randomised controlled pilot study | Egypt | Haematology-Oncology of Children’s Hospital | June 2010 to June 2011 | 90 / 33 females and 57 males / 2-18 years | 2 and 3 | NCI-CTC |
| Honey prevents oral mucositis in children undergoing chemotherapy: A quasi-experimental study with a control group3 | Bulut2  2016 | Quasi-experimental study with a control group | Turkey | Pediatric Hematology Oncology Clinic and Pediatric Chemotherapy Polyclinics | October 2009 and June 2013 | 76 / 38 females and 38 males / 6-17 years | No OM / all grades | WHOMAI |
| Effect of flavoured (honey and tulsi) ice chips on reduction of oral mucositis among children receiving chemotherapy4 | Mishra3  2017 | RCT | India | Hemato oncology units | February 2015 to May 2015 | 40 / 16 females and 24 males / 5-19 years | No OM | WHO mucositis scale |
| Effects of Honey on Oral Mucositis among Pediatric Cancer Patients Undergoing Chemo  /Radiotherapy Treatment at King Abdulaziz University Hospital in Jeddah, Kingdom of Saudi5 | Al Jaouni4  2017 | Open labelled RCT | Saudi Arabia | paediatric cancer ward | 1 year | 40 / 19 females and 21 males /  ＞1 Y | No OM /3 and 4 | WHO-STC |
| Effectiveness of Topical Application of Honey on Oral Mucosa of Children for the Management of Oral Mucositis Associated with Chemotherapy6 | Singh5  2019 | Observational blind design | India | Hemato oncology units | July 2015 to October 2015 | 100 / age and gender were not mentioned | 1 and 2 | WHO-STC |

| **Use of honey in the management of Chemotherapy associated oral mucositis in the paediatric patients**  **Data Extraction Form 2** | | | | | | | |
| --- | --- | --- | --- | --- | --- | --- | --- |
| People who complete this form: Luyang ZhangRevision date:15/06/2020 | | | | | | | |
| Title | Number of participants | | Inclusion criteria | Exclusion criteria | Intervention | comparison | Primary outcome |
| EG | CG |
| Honey and a Mixture of Honey, Beeswax, and Olive Oil–Propolis Extract in Treatment of Chemotherapy-Induced Oral Mucositis: A Randomized Controlled pilot study2 | 30/30 | 30 | Acute lymphoblastic leukaemia (ALL) during the consolidation phase of treatment; chemotherapy-related OM grades2 and 3 | Diabetes Mellitus; administration of antiviral or antifungal therapy and/or any other treatment for OM; neutropenia; advanced or severe periodontitis | Nature Honey / HOPE  (Routine oral care) | Benzocaine 7.5 % gel (Routine oral care) | The recovery time of OM |
| Honey prevents oral mucositis in children undergoing chemotherapy: A quasi-experimental study with a control group3 | 14/23 | 39 | All the children receiving chemotherapy; the participants had received previous and new leukaemia diagnoses or a lymphoma diagnosis; not diabetic or allergic to honey; received no honey from family members except during the study intervention | Diabetic, not capable of oral feeding, allergic to honey, received no honey from family members | Natural and standardized flower honey (routine and standard mouth care) | Routine mouth care. Phase 0 and 1: sodium bicarbonate (NaHCO3)  Phase 2: NaHCO3, vitamin E, ranitap, and tantum Phases 3 and 4: NaHCO3, vitamin E ranitap, tantum, mukostatin (triflucan), glycerin and novacaine (If there were improvements, glutamine and nephrogen were added) | The recovery time of OM; the severity of OM |
| Effect of flavoured (honey and tulsi) ice chips on reduction of oral mucositis among children receiving chemotherapy4 | 20 | 20 | Children who were receiving MTX; no OM prior to administration of MTX | Unclear | Honey and tulsi ice chips | Plain ice cubes | The recovery time of OM; the severity of OM |
| Effects of Honey on Oral Mucositis among Pediatric Cancer Patients Undergoing Chemo  /Radiotherapy Treatment at King Abdulaziz University Hospital in Jeddah, Kingdom of Saudi5 | 20 | 20 | Pediatric cancer patients at KAUH above 1 year of age treated with chemo/radiotherapy whose parents or their assigned care takers approved them to participate in this study signed a consent form | Less than one year old, refused to participate in this study, allergic to honey | Local Saudi commercial honey  (routine oral hygiene) | Routine oral hygiene (Lidocaine, Mycostatin, Daktarin mouth gel, and mouthwash) | The recovery time of OM |
| Effectiveness of Topical Application of Honey on Oral Mucosa of Children for the Management of Oral Mucositis Associated with Chemotherapy6 | 50 | 50 | Children with grade 1 and 2 chemotherapy-induced OM | Diabetes mellitus | Commercially available marketed honey product | Routine practice of analgesic and antiseptic gel application | The recovery time of OM |
| Notes: “EG” means experimental group and “CG” means control group. | | | | | | | |

## Table S4. Downs and Black instrument tool and criteria for each domain

| **Item** | **Criteria** | **Possible Answers** | Abdulrhman et al. (2012) | Bulut and Tüfekci (2016) | Mishra and Nayak (2017) | Al Jaouni et al. (2017) | Singh et al. (2019) |
| --- | --- | --- | --- | --- | --- | --- | --- |
| **Reporting** | | | | | | | |
| 1 | Is the hypothesis/aim/objective of the study clearly described? | Yes = 1  No = 0 | 1 | 1 | 1 | 1 | 1 |
| 2 | Are the main outcomes to be measured clearly described in the Introduction or Methods section? | Yes = 1  No = 0 | 1 | 1 | 0 | 1 | 1 |
| 3 | Are the characteristics of the patients included in the study clearly described? | Yes = 1  No = 0 | 1 | 1 | 1 | 1 | 1 |
| 4 | Are the interventions of interest clearly described? | Yes = 1  No = 0 | 1 | 1 | 1 | 1 | 1 |
| 5 | Are the distributions of principal confounders in each group of subjects to be compared clearly described? | Yes = 2  Partially = 1  No = 0 | 0 | 0 | 0 | 0 | 0 |
| 6 | Are the main ﬁndings of the study clearly described? | Yes = 1  No = 0 | 1 | 1 | 1 | 1 | 1 |
| 7 | Does the study provide estimates of the random variability in the data for the main outcomes? | Yes = 1  No = 0 | 0 | 0 | 0 | 0 | 0 |
| 8 | Have all important adverse events that may be a consequence of the intervention been reported? | Yes = 1  No = 0 | 0 | 0 | 0 | 0 | 0 |
| 9 | Have the characteristics of patients lost to follow-up been described? | Yes = 1  No = 0 | 1 | 1 | 1 | 1 | 1 |
| 10 | Have actual probability values been reported (e.g.0.035 rather than <0.05) for the main outcomes except where the probability value is less than 0.001? | Yes = 1  No = 0 | 1 | 1 | 1 | 1 | 0 |
| **External validity** | | | | | | | |
| 11 | Were the subjects asked to participate in the study representative of the entire population from which they were recruited? | Yes = 1  No = 0  Unable to determine = 0 | 0 | 0 | 0 | 0 | 0 |
| 12 | Were those subjects who were prepared to participate representative of the entire population from which they were recruited? | Yes = 1  No = 0  Unable to determine = 0 | 0 | 0 | 0 | 0 | 0 |
| 13 | Were the staff, places, and facilities where the patients were treated, representative of the treatment the majority of patients receive? | Yes = 1  No = 0  Unable to determine = 0 | 1 | 1 | 1 | 1 | 1 |
| **Internal validity-Bias** | | | | | | | |
| 14 | Was an attempt made to blind study subjects to the intervention they have received? | Yes = 1  No = 0  Unable to determine = 0 | 0 | 0 | 0 | 0 | 0 |
| 15 | Was an attempt made to blind those measuring the main outcomes of the intervention? | Yes = 1  No = 0  Unable to determine = 0 | 0 | 0 | 0 | 0 | 1 |
| 16 | If any of the results of the study were based on “data dredging”, was this made clear? | Yes = 1  No = 0  Unable to determine = 0 | 1 | 1 | 1 | 1 | 1 |
| 17 | In trials and cohort studies, do the analyses adjust for different lengths of follow-up of patients, or in case-control studies, is the time period between the intervention and outcome the same for cases and controls? | Yes = 1  No = 0  Unable to determine = 0 | 1 | 1 | 1 | 1 | 1 |
| 18 | Were the statistical tests used to assess the main outcomes appropriate? | Yes = 1  No = 0  Unable to determine = 0 | 1 | 1 | 1 | 1 | 1 |
| 19 | Was compliance with the intervention/s reliable? | Yes = 1  No = 0  Unable to determine = 0 | 1 | 1 | 1 | 1 | 1 |
| 20 | Were the main outcome measures used accurate (valid and reliable)? | Yes = 1  No = 0  Unable to determine = 0 | 1 | 1 | 1 | 1 | 1 |
| **Internal validity - confounding (selection bias)** | | | | | | | |
| 21 | Were the patients in different intervention groups (trials and cohort studies) or were the cases and controls (case-control studies) recruited from the same population? | Yes = 1  No = 0  Unable to determine = 0 | 1 | 1 | 1 | 1 | 1 |
| 22 | Were study subjects in different intervention groups (trials and cohort studies) or were the cases and controls (case-control studies) recruited over the same period of time? | Yes = 1  No = 0  Unable to determine = 0 | 1 | 1 | 1 | 1 | 1 |
| 23 | Were study subjects randomised to intervention groups? | Yes = 1  No = 0  Unable to determine = 0 | 1 | 0 | 1 | 1 | 0 |
| 24 | Was the randomised intervention assignment concealed from both patients and health care staff until recruitment was complete and irrevocable? | Yes = 1  No = 0  Unable to determine = 0 | 0 | 0 | 0 | 0 | 0 |
| 25 | Was there adequate adjustment for confounding in the analyses from which the main ﬁndings were drawn? | Yes = 1  No = 0  Unable to determine = 0 | 0 | 0 | 0 | 0 | 0 |
| 26 | Were losses of patients to follow-up taken into account? | Yes = 1  No = 0  Unable to determine = 0 | 1 | 1 | 1 | 1 | 1 |
| **Power** | | | | | | | |
| 27 | Did the study have sufficient power to detect a clinically important effect where the probability value for a difference being due to chance is less than 5%? Sample sizes have been calculated to detect a difference of x% and y%. | ＜n 1 = 0  n 1–n 2 = 1  n 3–n 4 = 2  n 5–n 6 = 3  n 7–n 8 = 4  n 8+ = 5 | 0 | 0 | 1 | 0 | 0 |
| **Total** | | | 18 | 17 | 17 | 17 | 16 |

**Notes:** Adapted by permission from BMJ Publishing Group Ltd. from: Downs SH, Black N. The feasibility of creating a checklist for the assessment of the methodological quality both of randomised and non-randomised studies of health care interventions. *J Epidemiol Commun H*. 1998;52(6):377-384.7 Copyright © 1998, BMJ Publishing Group Ltd. All rights reserved.

## Table S5. Characteristics of excluded studies

| **Author, year** | **Reasons for exclusion** |
| --- | --- |
| Al Jaouni et al., 20128 | Studies published in the symposium without sufficient information. |
| MASCC/ISOO, 20159 |
| Khanal et al., 201010 | Studies investigated the effectiveness of radiation-reduced OM. |
| Biswal et al., 200311 |
| Samdariya et al., 201512 |
| Elsass, 201713 | Study has no full-text access. |
| Kordahi, 201814 | Grey literature did not report results. |

**References**

1. Sonis ST, Elting LS, Keefe D, et al. Perspectives on cancer therapy-induced mucosal injury: pathogenesis, measurement, epidemiology, and consequences for patients. *Cancer-Am Cancer Soc*. 2004;100(9 Suppl):1995-2025.

2. Abdulrhman M, Elbarbary NS, Ahmed AD, Saeid ER. Honey and a mixture of honey, beeswax, and olive oil-propolis extract in treatment of chemotherapy-induced oral mucositis: a randomized controlled pilot study. *Pediatr Hemat Oncol*. 2012;29(3):285-292.

3. Kobya BH, Guducu TF. Honey prevents oral mocositis in children undergoing chemotherapy: a quasi-experimental study with a control group. *Complement Ther Med*. 2016;29:132-140. doi: 10.1016/j.ctim.2016.09.018.

4. Mishra L, Nayak G. Effect of flavoured (honey and tulsi) ice chips in reduction of oral mucositis among children receiving chemotherapy. *Int J Pharm Sci Rev Res*. 2017;43(107):25-28.

5. Al JSK, Al MMS, Hussein A, et al. Effects of honey on oral mucositis among pediatric cancer patients undergoing chemo/radiotherapy treatment at king abdulaziz university hospital in jeddah, kingdom of saudi arabia. *Evidence-based complementary and alternative medicine : eCAM*. 2017;2017:1-7.

6. Singh R, Sharma S, Kaur S, Medhi B, Trehan A, Bijarania SK. Effectiveness of topical application of honey on oral mucosa of children for the management of oral mucositis associated with chemotherapy. *Indian J Pediatr*. 2019;86(3):224-228.

7. Downs SH, Black N. The feasibility of creating a checklist for the assessment of the methodological quality both of randomised and non-randomised studies of health care interventions. *J Epidemiol Commun H*. 1998;52(6):377-384D.

8. Al Jaouni S, Hussein A, Al Muhayawi M, et al. PO22 Honey reduces chemoradiotherapy-induced mucositis in pediatric cancer patients. *Critical Reviews in Oncology/Hematology*. 2012;(82):S17.

9. Abstracts of the 2015 International MASCC/ISOO Symposium. *Support Care*

*Cancer.* 2015; 23**,**1–388.

10. Khanal B, Baliga M, Uppal N. Effect of topical honey on limitation of radiation-induced oral mucositis: an intervention study. *International Journal of oral and maxillofacial surgery*. 2010; 39(12):1181-1185.

11. Biswal B M, Zakaria A, Ahmad N M. Topical application of honey in the management of radiation mucositis. A preliminary study. *Supportive Care in Cancer*. 2003;11(4):242-248.

12. Samdariya S, Lewis S, Kauser H, et al. A randomized controlled trial evaluating the role of honey in reducing pain due to radiation-induced mucositis in head and neck cancer patients[J]. *Indian journal of palliative care*. 2015; 21(3): 268.

13. Elsass F T. A Sweet Solution: The Use of Medical-grade Honey on Oral Mucositis in the Pediatric Oncology Patient. *Wounds: a Compendium of Clinical Research and Practice*. 2017; 29(12): E115-E117.

14. Lina K. Honey or Olive Oil for Treating Oral Mucositis in Children and Adults With Leukemia Receiving Intensive Chemotherapy. [*ClinicalTrials.gov*](https://beta.clinicaltrials.gov/)*.* https://clinicaltrials.gov/ct2/show/NCT03399331.
